# Supplementary material
Source: HighWire-hosted journal article supplement (http://jneurosci.org/highwire/filestream/601833/field_highwire_adjunct_files/0/Supplemental_Material.pdf)
Supplement: Supplemental_Material.pdf [file Supplemental_Material.pdf]

## SUPPLEMENTAL MATERIALS

### Supplemental Figure 1

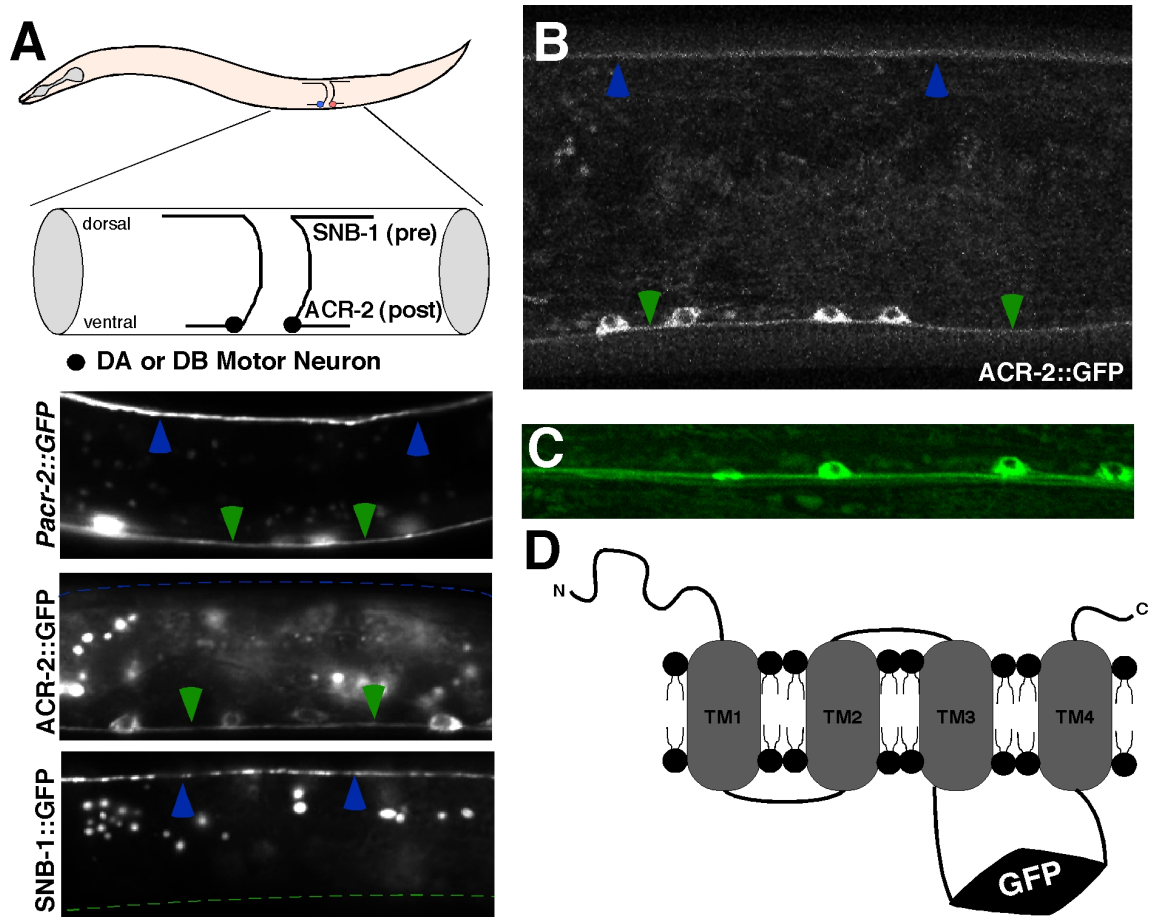

**Figure S1. Expression of the non-alpha nAChR subunit ACR-2.**

(A) Schematic depicting morphology of cholinergic DA and DB motor neurons in an L1 animal. Wide-field epifluorescent projection images of the ventral (green) and dorsal (blue) nerve cords in L1 animals expressing integrated arrays containing either the transcriptional reporter *Pacr-2::GFP* (*ufIs49*, top), full-length *Pacr-2::ACR-2::GFP* (*ufIs42*, middle) or a presynaptic marker (*Punc-4::SNB-1::GFP*, lower). *Pacr-2::GFP* fluorescence is present in both ventral and dorsal nerve cords. Expression of the synaptic vesicle marker synaptobrevin (SNB-1::GFP) is limited to axons of the dorsal nerve cord. ACR-2::GFP fluorescence is limited to dendrites in the ventral nerve cord. (B) Projection

of a confocal stack showing the dorsal and ventral nerve cords of an adult animal expressing full-length ACR-2::GFP. (C) Confocal image of ventral nerve cord showing diffuse ACR-2::GFP fluorescence. (D) Schematic of ACR-2 membrane topology and site of GFP insertion.

### Supplemental Figure 2

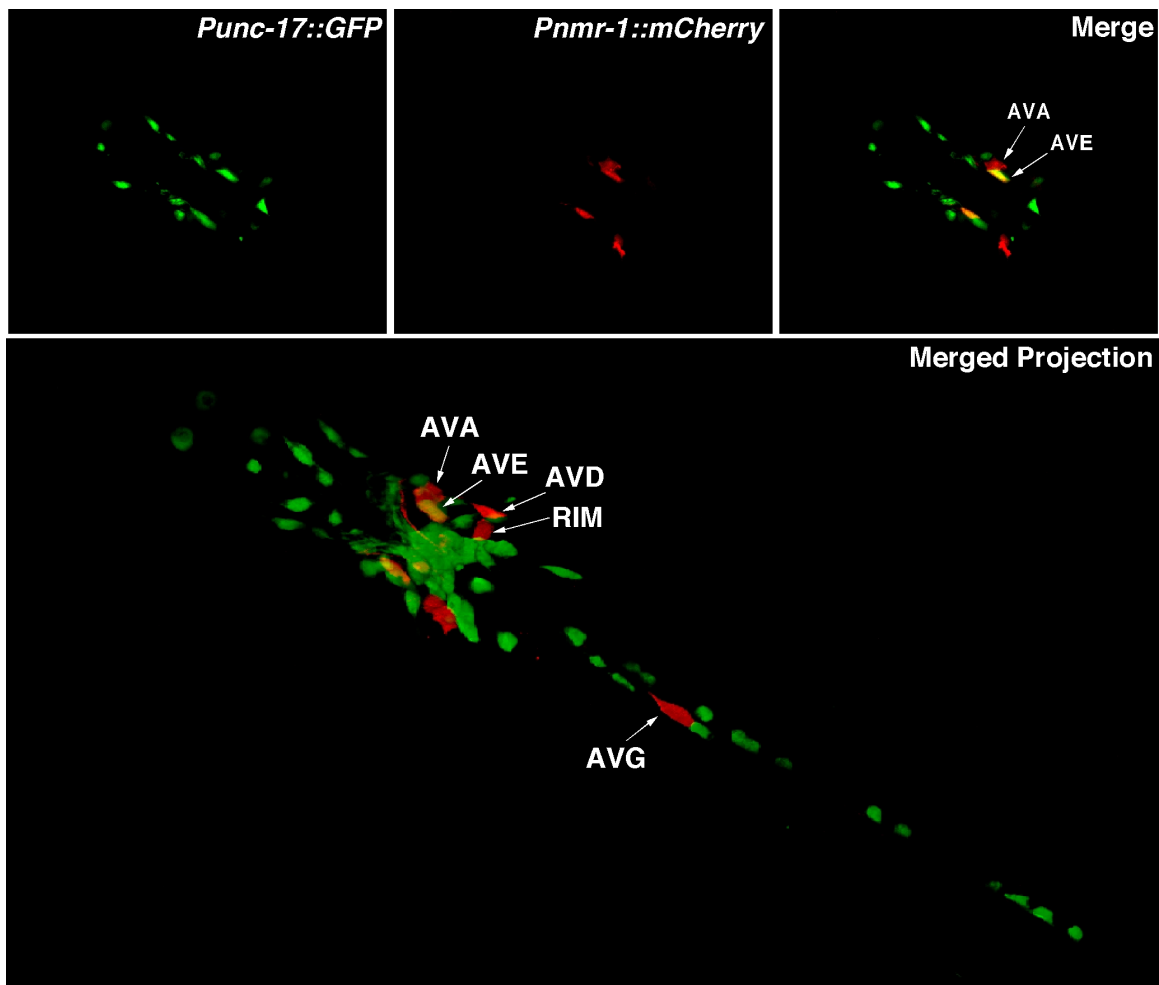

**Figure S2. *C. elegans* command interneurons do not express *Punc-17::GFP*.**

(A-C) Single confocal images of an animal co-expressing an integrated array (*vsIs48*) containing the cholinergic neuron marker *Punc-17::GFP* together with an

extrachromosomal array (*ufEx158*) containing *Pnmr-1::mCherry*. **(D)** A confocal projection showing the relative positions of neuronal cell bodies expressing *Punc-17::GFP* and *Pnmr-1::mCherry* in the head of the worm. Neurons expressing mCherry are indicated. Only a single AVA neuron expresses mCherry due to mosaic expression of the array.

### Supplemental Figure 3

**A** 1 MKKTVKILLILITVFLKVHCNGGGHDDEAADFLSHTNIDDPNNSSDPNKNS  
 51 DQGD<sup>□</sup>TMGEDEDRLVIDLFREYNFLIRPVKNVSSPPVVVDFGVAMILLIV  
 101 DEKNQILQTNVWLTMKWNDQLAWNPAEYGNISNLHVPSDRVWLPDIVLF  
 151 NNADGNYEVSFKSNVFDHHDGVTWVPPAMFKSS<sup>□</sup>CRIDVEWF<sup>□</sup>PFDEQCCT  
 201 LVFGSWTYNSEEVRLHWYNNIQAVQLHDYSYSGIWDVIDVPGQLVHKPDL  
 251 KENKMFVNVVIRRKTLFYTVILIIPTVLM<sup>□</sup>AFLSVMAFYLPVDSGEKVSLT  
 301 ISLL<sup>□</sup>LALVVFLLLVSKILPPTSNIPLMGKYL<sup>□</sup>LLAFVLNITAVVGTVVIVN  
 351 IYFRSALSHKMPTWVRKVFLEFLPHLLVMKRPERIPFNGYFVEEYCASE  
 401 IFDASLVMP<sup>□</sup>SMTATMLPFLQVTTNLKAASSTSSGQSSEHHE<sup>\*</sup>NC<sup>□</sup>SKWKKRL  
 451 SIRMSKRRAPRARLDD<sup>□</sup>SEDIIDDTNGNHVDSLQEKISKEMKTTVEAIAY  
 501 IAEHMKREMSLKKMRDDWKYVAMVLDRLILLIFFGVTLGGTLGIICSAPH  
 551 VFDFVDQEAII<sup>□</sup>SKLNAKYLP<sup>□</sup>SDMYS

**B** M2 Transmembrane Region

|         |                                              |
|---------|----------------------------------------------|
| ACR-2   | <u>EKVSLTISLL<sup>□</sup>LALVVFLLLVSKILP</u> |
| BETA1   | EKMGLSIFALLTLTVFLLLLADKVP                    |
| BETA2   | EKMTLCISVLLALTVFLLLLISKIVP                   |
| BETA4   | EKMTLCISVLLALTFLLLLISKIVP                    |
| GAMMA   | QKCTVATNVLLAQT <sup>□</sup> VFLFLVAKKVP      |
| DELTA   | EKTSVAISVLLAQSVFLLLLISKRLP                   |
| EPSILON | QKCTVSINVLLAQT <sup>□</sup> VFLFLIAQKIP      |

**Figure S3. Sequence features of ACR-2.**

**(A)** Amino acid sequence of ACR-2. Predicted signal sequence (dashed box), transmembrane domains (underline), cys-loop (gray), gain-of-function mutation (box),

and site of GFP insertion (asterisks) are indicated. **(B)** Alignment of the second transmembrane domain of ACR-2 and various mammalian non-alpha subunits. The site of the 9' leucine to serine gain-of-function mutation is indicated (box).

#### Supplemental Figure 4

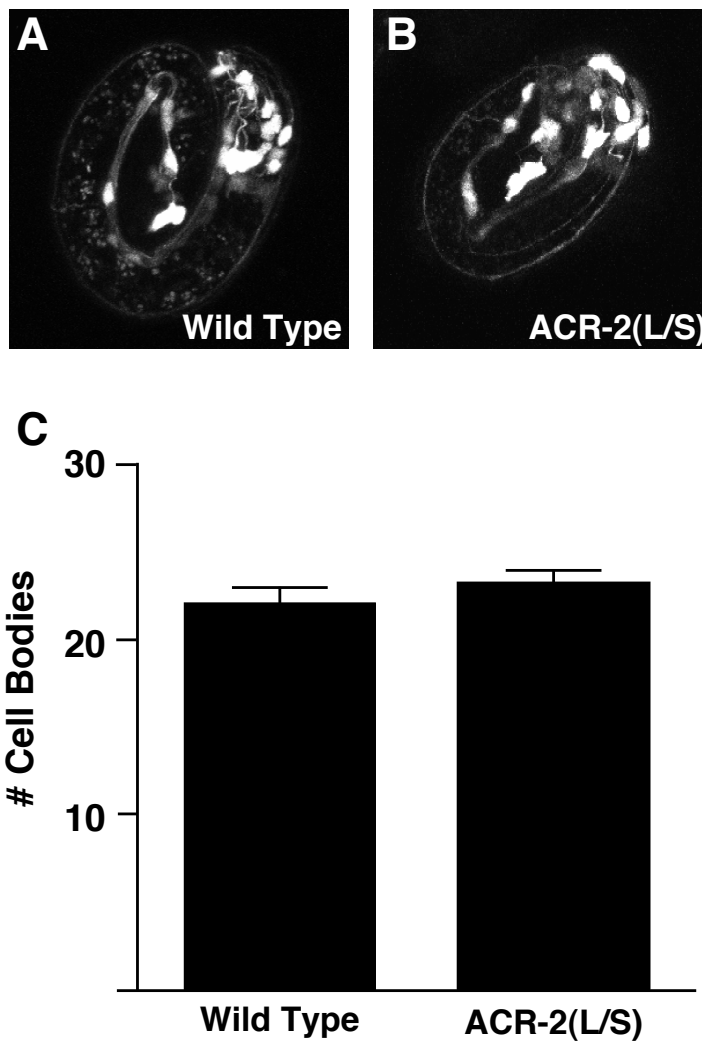

**Figure S4. Wild type and ACR-2(L/S) animals have the same number of *acr-2* expressing cells at the 3-fold embryo stage.**

**(A and B)** Confocal images of wild type (A) and ACR-2(L/S) (B) 3-fold embryos expressing an integrated array containing *Pacr-2::GFP* (*ufIs49*). Images represent Z-projections of 23 slices (0.5  $\mu\text{m}$ /slice). **(C)** Quantification of the average number of *Pacr-2::GFP* labeled cell bodies present in wild type and ACR-2(L/S) 3-fold embryos. Data represents the mean  $\pm$  SEM of at least ten animals per genotype.

### Supplemental Figure 5

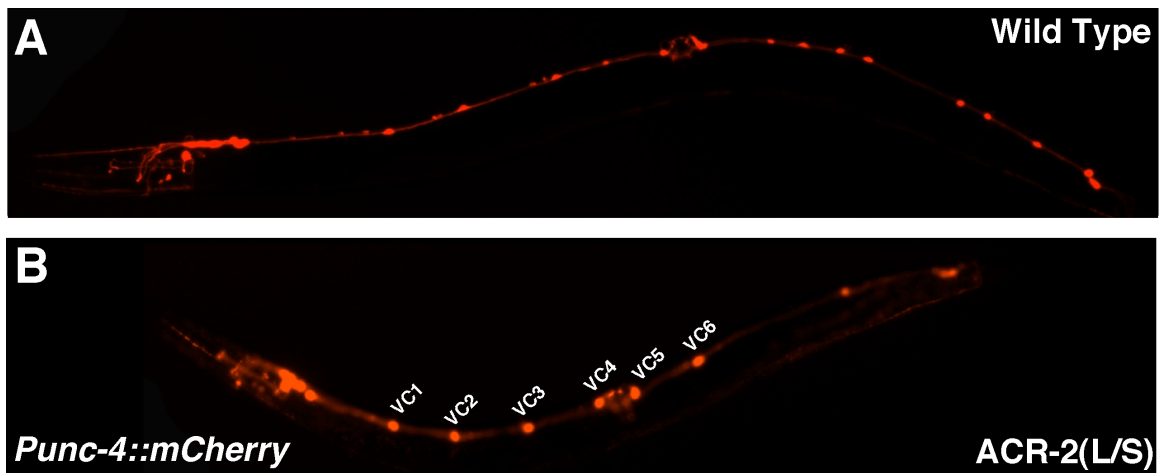

**Figure S5. The VC neurons remain present in transgenic ACR-2(L/S) animals.**

Confocal images of wild type (A) and ACR-2(L/S) (B) animals expressing an integrated array (*ufIs26*) that contains *Punc-4::mCherry*.

## Supplemental Figure 6

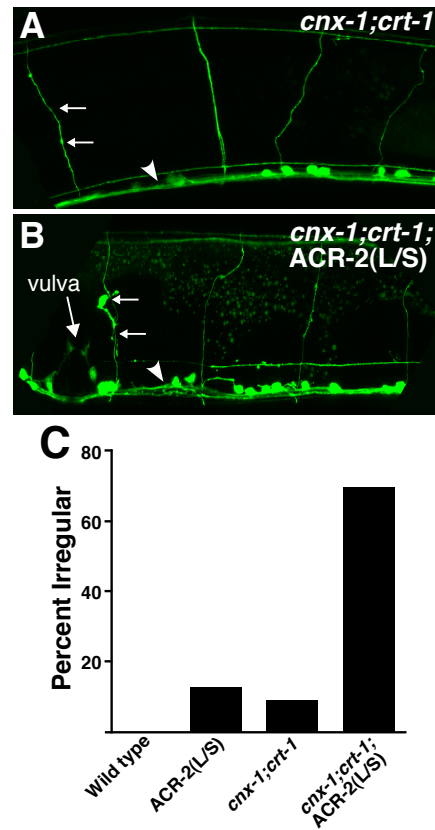

**Figure S6. Motor neuron processes are irregular in *cnx-1;crt-1* double mutants expressing transgenic ACR-2(L/S).**

(A and B) Confocal images of commissural processes and ventral nerve cord processes in *cnx-1;crt-1* double mutants (A) and *cnx-1;crt-1* double mutants expressing the ACR-2(L/S) transgene (B). Arrowheads show normally fasciculated ventral nerve cord in *cnx-1;crt-1* double mutants (A) and defasciculation in *cnx-1;crt-1;ACR-2(L/S)* animals (B). Arrows show normal commissural process in (A) and ectopic sprouting in (B). In each case, a region immediately posterior of the vulva was imaged and the ventral nerve cord is positioned at the bottom. Images show Z-projections of 34 confocal planes (A) or 33 confocal planes (B) (0.5  $\mu\text{m}$ /slice). For all fluorescent imaging, animals are expressing an integrated *Punc-17::GFP* transgene (*vsIs48*). (C) Quantification of the percentage of

irregular commissural processes in wild type (15 commissures from 5 animals), transgenic ACR-2(L/S) (39 commissures from 10 animals), *cnx-1;crt-1* (75 commissures from 19 animals) and *cnx-1;crt-1;ACR-2(L/S)* (93 commissures from 17 animals). Since *Punc-17::GFP* also labels AS motor neurons that project commissural axons and do not express *acr-2*, the percentage of axonal defects in ACR-2(L/S) expressing neurons is likely higher.

**Supplemental Table 1.** Suppressors of ACR-2(L/S) induced paralysis isolated from a forward genetic screen.

| Allele <sup>†</sup> | % Paralyzed*<br>(levamisole) | Gene          |
|---------------------|------------------------------|---------------|
| Wild type           | 90±3                         |               |
| <i>e264</i>         | 3±3                          | <i>unc-38</i> |
| <i>uf62</i>         | 0                            | <i>unc-38</i> |
| <i>uf67</i>         | 0                            | <i>unc-38</i> |
| <i>uf153</i>        | 0                            | <i>unc-38</i> |
| <i>E306</i>         | 0                            | <i>unc-50</i> |
| <i>uf86</i>         | 3±3                          | <i>unc-50</i> |
| <i>e883</i>         | 0                            | <i>unc-74</i> |
| <i>uf124</i>        | 0                            | <i>unc-74</i> |
| <i>uf72</i>         | 5±5                          | <i>unc-74</i> |
| <i>ok1075</i>       | 3±2                          | <i>unc-63</i> |
| <i>uf79</i>         | 5±5                          | <i>unc-63</i> |
| <i>ok367</i>        | 94±4                         | <i>acr-12</i> |
| <i>uf65</i>         | 95±5                         | <i>acr-12</i> |
| <i>uf65</i>         | 75±12                        | <i>acr-12</i> |
| <i>uf65</i>         | 85±5                         | <i>acr-12</i> |
| <i>uf65</i>         | 70±10                        | <i>acr-12</i> |
| <i>uf65</i>         | 100                          | <i>acr-12</i> |
| <i>uf66</i>         | 90±4                         | <i>acr-12</i> |
| <i>uf66</i>         | 98±3                         | <i>acr-12</i> |
| <i>uf66</i>         | 85±5                         | <i>acr-12</i> |
| <i>uf77</i>         | 95±5                         | <i>acr-12</i> |
| <i>uf77</i>         | 45±5                         | <i>acr-12</i> |
| <i>uf77</i>         | 93±5                         | <i>acr-12</i> |
| <i>uf77</i>         | 95±5                         | <i>acr-12</i> |
| <i>uf77</i>         | 75±5                         | <i>acr-12</i> |
| <i>uf77</i>         | 95±5                         | <i>acr-12</i> |
| <i>uf94</i>         | 78±6                         | <i>acr-12</i> |
| <i>uf94</i>         | 80±10                        | <i>acr-12</i> |

|              |       |               |
|--------------|-------|---------------|
| <i>uf95</i>  | 100   | <i>acr-12</i> |
| <i>uf95</i>  | 85±5  | <i>acr-12</i> |
| <i>uf95</i>  | 100   | <i>acr-12</i> |
| <i>uf117</i> | 100   | <i>acr-12</i> |
| <i>uf117</i> | 85±5  | <i>acr-12</i> |
| <i>uf117</i> | 90±10 | <i>acr-12</i> |

Gray shading denotes available alleles used as reference

\*denotes percentage of animals paralyzed after 120 minutes in the presence of 200  $\mu$ M levamisole

† Alleles listed multiple times indicated duplicate isolates of the same allele. Forty-four additional levamisole-resistant mutants (<20% paralyzed) were isolated but not characterized further.
